1 **Medium-throughput zebrafish optogenetic platform identifies deficits in subsequent neural**  
2 **activity following brief early exposure to cannabidiol and  $\Delta$ -9-tetrahydrocannabinol**

3

4 Richard Kanyo<sup>1,2</sup>, Md Ruhul Amin<sup>2</sup>, Laszlo F. Locskai<sup>1,2</sup>, Danika D. Bouvier<sup>2</sup>,  
5 Alexandria M. Olthuis<sup>2</sup>, W. Ted Allison<sup>1,2,3</sup>, and Declan W. Ali<sup>2,\*</sup>

6

7

8 <sup>1</sup> Centre for Prions & Protein Folding Disease, University of Alberta, Edmonton AB, T6G 2M8

9 <sup>2</sup> Department of Biological Sciences, University of Alberta, Edmonton AB, T6G 2E9

10 <sup>3</sup> Department of Medical Genetics, University of Alberta, Edmonton AB, T6G 2H7, Canada

11

12

13

14

15

16

17

18

19

20

21

22

23 \* Author for correspondence (phone: (780) 492-6094; fax: (780) 492-9234; email:

24 [declan.ali@ualberta.ca](mailto:declan.ali@ualberta.ca))

25 **Abstract**

26 In the light of legislative changes and the widespread use of cannabis as a recreational and  
27 medicinal drug, delayed effects of cannabis upon brief exposure during embryonic development  
28 are of high interest as early pregnancies often go undetected. Here, zebrafish embryos were  
29 exposed to cannabidiol (CBD) and  $\Delta$ -9-tetrahydrocannabinol 1 (THC) until the end of  
30 gastrulation (1-10 hours post-fertilization) and analyzed later in development (4-5 days post-  
31 fertilization). In order to measure neural activity, we implemented CaMPARI (Calcium-  
32 Modulated Photoactivatable Ratiometric Integrator) and optimized the protocol for a 96-well  
33 format complemented by locomotor analysis. Our results revealed that neural activity was  
34 decreased by CBD more than THC. At higher doses, both cannabinoids could dramatically  
35 reduce neural activity and locomotor activity. Interestingly, the decrease was more pronounced  
36 when CBD and THC were combined. At the receptor level, CBD-mediated reduction of  
37 locomotor activity was partially prevented using cannabinoid type 1 and 2 receptor inhibitors.  
38 Overall, we report that CBD toxicity occurs via two cannabinoid receptors and is synergistically  
39 enhanced by THC exposure to negatively impact neural activity late in larval development.  
40 Future studies are warranted to reveal other cannabinoids and receptors involved in this pathway  
41 to understand the subsequent health implications of cannabis consumption on fetal development.

42

43

44

45

## 46 **Introduction**

47 Cannabis is consumed most commonly as a recreational drug that is often portrayed as  
48 harmless, yet the health implications are not fully understood<sup>1</sup>. The positive association of this  
49 drug in the public eye is not a surprise considering extracts of the *Cannabis sativa* plant have  
50 been used for medical purposes for almost 5000 years, especially for pain treatment<sup>2</sup>. However,  
51 scientific knowledge is limited and despite controversy, some countries, more recently Canada,  
52 continue to legalize cannabis for recreational use. Cannabis has been reported to be one of the  
53 most illicitly used drugs during pregnancy, with increase in consumption over the years, and key  
54 compounds,  $\Delta$ -9-tetrahydrocannabinol (THC) and cannabidiol (CBD), can readily cross the  
55 placenta<sup>3-8</sup>. We were especially interested in CBD due to the reported health benefits and  
56 availability in many natural products including oils and food<sup>9</sup>. In the past, the negative impacts  
57 of cannabis in connection to embryonic development have been principally associated with the  
58 psychoactive THC<sup>10</sup>. In humans, epidemiological and clinical studies associate maternal  
59 cannabis exposure to behavioural disturbances in the offspring linked to increased risk for  
60 neuropsychiatric disorders<sup>11</sup>. In rats, maternal exposure of THC changed a series of behaviours  
61 in the offspring, including water-induced grooming, increased light sensitivity and altered  
62 exploratory behaviour<sup>12</sup>. Recently, the negative impacts of cannabis have expanded and also  
63 include the non-psychoactive CBD, which disrupts motor-neuron development in zebrafish<sup>13</sup>.  
64 This study is in contrast to reports that suggest positive health benefits of CBD, by treating  
65 nausea during pregnancy<sup>14,15</sup>.

66 The mechanistic pathway(s) by which THC and CBD are toxic are elusive. A new study  
67 linked these two cannabinoids to the sonic hedgehog signaling pathway in mice and zebrafish,  
68 and appears to involve cannabinoid type 1 receptor (CB1R)<sup>16</sup>. It is well established that THC

69 binds and activates as a partial agonist two distinct classes of G-coupled protein receptors, CB1R  
70 and CB2R<sup>17</sup>. Both receptors are highly expressed in neuronal tissue where CB1R is localized  
71 mostly in the CNS<sup>18-20</sup> and CB2R in the peripheral nervous system<sup>21</sup>, although CB2R has been  
72 also linked to the CNS<sup>22-24</sup>. CBD has been reported to interact with CB1R and CB2R, but with a  
73 lower affinity relative to THC, and rather antagonizes cannabinoid-induced effects indirectly  
74 through other receptors<sup>25-29</sup>. Additional data to illuminate signaling pathways of THC and CBD  
75 *in vivo* would highlight functional important mechanisms.

76 Zebrafish embryos have several advantages that complement mammalian models.  
77 Experiments are economical because many embryos are available, and exposure studies are  
78 simple as compounds can be easily added and removed. Further, embryos develop outside the  
79 female and therefore not confounded by maternal physiology and variable transport to fetus.  
80 Translucent larvae provide opportunities to implement cutting-edge fluorescing calcium sensors  
81 and measure neural activity. Past studies suggest that the endocannabinoid system plays a role in  
82 zebrafish development<sup>30-32</sup>. In addition, both cannabinoid receptors investigated here have  
83 similar expression profiles in the CNS compared to mammals, with CB1R sharing a 70 % protein  
84 sequence identity with the human homolog<sup>33</sup>. Therefore, the zebrafish is an excellent model  
85 organism to further illuminate biological mechanisms. Considering the anticipated effects of  
86 THC and CBD, high-throughput quantification of neural activity following early exposures  
87 would be of great interest. In this study, the calcium modulated photoactivatable ratiometric  
88 integrator (CaMPARI)<sup>34</sup>, was implemented. Green fluorescing CaMPARI undergoes  
89 photoconversion (PC) to a red fluorescing protein only in the presence of intense 405 nm light  
90 and high Ca<sup>2+</sup> levels. This conversion is irreversible, thus creating a temporal snapshot in a form  
91 of a ratiometric red/green output. CaMPARI is expressed exclusively in neuronal tissue due to a

92 pan-neural promoter (*elavl3*, a.k.a. HuC) and is a direct read-out of relative neural activity.  
93 Initially, this innovation was not suitable for a screening tool as the photoconversion was not  
94 efficient enough. Thus, we have optimized the use of CaMPARI, such that the photoconversion  
95 is more efficient and practical for high throughput well-plate-formats. This allows our novel *in*  
96 *vivo* assay to measure neural activity and potentially screen large libraries of compounds. Our  
97 results were supplemented with a behavioral assay obtained from the same larvae, which offers  
98 an independent proxy measure that is related to neural activity.

99         Here, we investigated the effects of the two most abundant cannabinoids found in the  
100 plant, THC and CBD, on neural activity and characterized CB1R and CB2R *in vivo* on the CBD  
101 effects in zebrafish. The effects of early THC and CBD exposure from immediately after egg  
102 fertilization until the end of gastrulation, at 10 hour post-fertilization (hpf), were monitored later  
103 in embryonic development, at 4 and 5 days post-fertilization (dpf). The concentrations used in  
104 this study mimic plasma levels of human subjects with high cannabis consumption<sup>35-37</sup>, but we  
105 do have to consider that the molecules have to pass from the waterbath through the chorion into  
106 the plasma of the zebrafish embryo. THC and CBD were studied individually and then together  
107 to understand the impact of individual compounds by themselves and to partially mimic the  
108 cannabis available for recreational purposes. Further, we characterized the cannabinoid receptors  
109 involved using established receptor inhibitors for CB1R and CB2R. This was important, because  
110 with many receptors being linked to cannabinoids *in vitro*, additional functional *in vivo* evidence  
111 would be of great value.

112

113

## 114 **Results**

### 115 **High-throughput assessment of CaMPARI is a reliable metric of neural activity.**

116 In this study the objective was to gain insight in the effects of THC and CBD on neural  
117 activity during early embryonic development. We measured neural activity with CaMPARI.  
118 CaMPARI photoconverts irreversibly from a green to a red fluorescing protein only if user-  
119 applied 405 nm light application coincides with high calcium levels (Fig. 1a)<sup>34</sup>. Red and green  
120 fluorescing CaMPARI are quantified as ratio (referred here as “CaMPARI activity”). We  
121 expressed CaMPARI through a pan-neural promoter, *elavl3* exclusively in the CNS and thus as a  
122 read-out of neural activity (Fig. 1b). Here, we optimized the use of CaMPARI zebrafish for an  
123 automated high-content INCell2000 plate-reader (Fig. 1c). CaMPARI transgene expression was  
124 most suitable for this platform at 4 dpf, which is a suitable balance of fluorescing intensity and a  
125 sufficiently developed brain.

126 CaMPARI activity was quantified and displayed as a heatmap consisting of the red/green  
127 ratio in fluorescing intensities. At 4 dpf, optic tectum and hindbrain regions of larvae showed a  
128 clear measureable output, whereas without photoconversion CaMPARI activity was nearly zero.  
129 To establish a baseline of near-zero neural activity, larvae were anesthetized with MS-222, and a  
130 significant reduction ( $p < 0.01$ ) in red/green ratio was obtained compared to freely swimming  
131 larvae. In contrast, drug-induced neural activity, with the established convulsants  
132 pentylenetetrazole (PTZ) or 4-aminopyridine (4-AP), showed a consistent increase in CaMPARI  
133 activity, even at concentrations considered to be minimal when inducing seizure (Fig. 1d,e)<sup>38</sup>.

134 We benchmarked our CaMPARI outputs against locomotor activity of zebrafish larvae,  
135 which is an established metric of neural activity<sup>39</sup>. We chose 5 dpf as an optimal developmental

136 timepoint for analyzing locomotor activity, because younger larvae are largely inactive. Larvae  
137 were left in the same 96-well plate for assessing CaMPARI and locomotion. Exposing larvae to  
138 photoconversion with LED light the day before had no impact on the mean locomotor activity  
139 (Fig. 1f). Larvae anesthetized with MS-222 did not display any detectable swim bouts (Fig. 1f).  
140 The level of neural activity correlated with locomotor activity and will be presented later.  
141 Overall, these results show that CaMPARI, deployed in zebrafish larvae is a reliable high-  
142 throughput tool for measuring neural activity.

143

#### 144 **CBD and THC reduce subsequent neural activity.**

145 We sought to assess how embryonic exposure to cannabinoids impacts upon subsequent  
146 neural activity later in development. Here, the doses of CBD and THC aligned with our previous  
147 work<sup>13</sup>, reflecting high cannabis consumption in humans. Comparisons of our dosage to humans  
148 requires various considerations: (i) blood plasma concentrations of THC can peak up to 0.25  
149 mg/l while smoking a single cigarette<sup>35</sup>; (ii) the content of THC has increased in the past 20  
150 years; and (iii) doses of intraperitoneally administered medical CBD can vary greatly, from 5-  
151 100 mg/kg, and daily maximum of 1500 mg/kg<sup>36,37</sup>. The current study uses up to 6  $\mu$ g/mL of  
152 THC and 3  $\mu$ g/mL of CBD. Absorption studies using Liquid Chromatography-Tandem Mass  
153 Spectrometry suggest that typically an estimated 0.1-10 % of toxic compounds will pass through  
154 the chorion to reach the embryo<sup>40,41</sup>.

155 We wanted to gain insight into the effects of CBD and THC separately (Fig. 2a), and  
156 therefore each was applied in a dose-response format. This validation was necessary as  
157 CaMPARI has not been used in studying cannabinoids. Compounds were added to the bath early

158 in animal development at (0.5 hpf) and then washed out towards the end of gastrulation (10 hpf).  
159 CaMPARI was imaged at 4 dpf and locomotor activity was assessed at 5 dpf (Fig. 2b). Animals  
160 that were exposed to CBD at concentrations of 2  $\mu\text{g/ml}$  and 3  $\mu\text{g/ml}$  exhibited a dose-dependent  
161 reduction in CaMPARI activity (Fig. 2c,d). These reductions in CaMPARI output are substantial  
162 when compared against the ~50 % reduction we observed in anesthetized larvae, where little  
163 neural activity is expected. Coordinated with this, locomotion was also reduced starting at 1.5  
164  $\mu\text{g/ml}$  and was significant ( $p<0.01$ ) at 3  $\mu\text{g/ml}$  (Fig. 2e). THC had a similar effect as CBD and  
165 also reduced neural activity at higher doses, 4  $\mu\text{g/ml}$  and 6  $\mu\text{g/ml}$ , (Fig. 2f,g). Locomotor activity  
166 exhibited a more extensive reduction at 6  $\mu\text{g/ml}$  (Fig. 2h). We compared neural activity and  
167 locomotion in the same individuals exposed to effective doses of cannabinoids and found  
168 significant correlations (Fig. S2; CBD  $r=0.52$  ( $p<0.01$ ) and THC  $r=0.71$  ( $p<0.01$ )). Indeed, most  
169 larvae, that displayed reduced neural activity also showed reduced locomotion. Together, our  
170 findings show that both CBD and THC reduced neural activity when exposed early in  
171 development.

172

173 **Antagonistic effects of CBD on neural activity is enhanced when combined with sub-**  
174 **effective doses of THC.** Cannabis consumption during pregnancy exposes the fetus to THC and  
175 CBD in concert. In order to investigate whether CBD and THC have a combined effect that is  
176 different from either compound on its own, neural activity was measured when larvae were  
177 exposed to both cannabinoids, using the same timeline as the previous experiment (Fig. 2b).  
178 First, various sub-effective doses of CBD were applied from 0.5 to 1.5  $\mu\text{g/ml}$  in the presence of 2  
179  $\mu\text{g/ml}$  THC (identified as sub-effective in Fig. 2). Preliminary dosage attempts revealed small,  
180 but significant differences with  $p<0.01$  and  $p<0.05$ , respectively, on neural activity when



181 combining 0.5 or 1.5  $\mu\text{g/ml}$  CBD with 2.0  $\mu\text{g/ml}$  THC (Fig. S3a,b). Locomotor activity also  
182 trended towards a dose-dependent reduction during concerted application of CBD and THC and  
183 was significant at 1.5  $\mu\text{g/ml}$  with  $p < 0.01$  (Fig. S3c). Next, CBD and THC were added in a 1:1  
184 ratio mixture at 1.0 and 2.0  $\mu\text{g/ml}$  each. An enhanced antagonistic effect was revealed on neural  
185 activity when both CBD and THC were added at 2.0  $\mu\text{g/ml}$ . CBD by itself at 2.0  $\mu\text{g/ml}$   
186 significantly ( $p < 0.05$ ) reduced neural activity (Fig. 3d,e) consistent with results in Fig. 2d, but  
187 CBD and THC together, further ( $p < 0.01$ ) reduced neural activity compared to CBD or THC  
188 alone (Fig. 3d,e). The combined effects of CBD and THC seemed synergistic in that CBD by  
189 itself at 2.0  $\mu\text{g/ml}$ , although significant, had a relative small effect and THC by itself at 2.0  
190  $\mu\text{g/ml}$  had no effect. However, when CBD and THC at the same concentration were combined  
191 neural activity was reduced close to the mean of MS-222 anesthetized samples suggesting no to  
192 very little real neural activity. Locomotor activity was mainly affected by CBD with no  
193 additional reduction when compared to CBD and THC combined (Fig. 3f). No significant effect  
194 on neural activity or locomotor activity was obtained when 1.0  $\mu\text{g/ml}$  of CBD and THC was  
195 applied (Fig. 3a-c). Due to the effect on locomotion, we also wanted to assess the integrity of  
196 neurons in connection to motor axons. Reticulospinal neurons in the hindbrain were stained with  
197 RMO44 antibody targeting NEFM, an established marker for neuronal damage<sup>42,43</sup>. Indeed,  
198 RMO44 immunostaining was further reduced when CBD and THC were combined at 2.0  $\mu\text{g/ml}$   
199 suggesting that both CBD and THC affect neuronal health (Fig. 4S). Together, these results  
200 suggest that CBD and THC are more potent in reducing neural activity when applied in  
201 combination.

202

203           **CB1R and CB2R are both required for CBD-induced reduction of locomotor**  
204 **activity.** Some reports suggest that CBD mediates its actions through CB1- and CB2-  
205 receptors<sup>25</sup>. To test whether these two receptors are involved in the neuronal toxicity mediated by  
206 CBD *in vivo*, we deployed corresponding receptor inverse agonist AM251 and antagonist  
207 AM630. This pharmacological approach allowed the temporal specificity required for our  
208 experimental design. Both inhibitors appear to act with good specificity in zebrafish. Previous  
209 works support the specificity of CB1R and CB2R inhibitors used in this study<sup>44,45</sup>. In connection  
210 to CB2R, a recent study has shown that CB2 receptors are required for the action of AM630 on  
211 zebrafish behaviour. The impact AM630 had on wildtype larvae was not detectable when applied  
212 to *cnr2*<sup>-/-</sup> mutant larvae, supporting drug specificity. Moreover, AM630 treated zebrafish showed  
213 very similar photo-dependent response compared to the CB2 knockout<sup>44</sup>. Similar in regards to  
214 CB1R, because knocking out CB1R and inhibiting CB1R with AM251 caused a similar response  
215 in rescuing locomotor activity when suppressed with cannabinoid-receptor agonist, WIN55,212-  
216 2<sup>45</sup>. All three metrics measured (acclimatization, dark-adaption and recovery) for locomotion  
217 displayed arguably the same rescue-pattern in *cnr1*<sup>-/-</sup> mutant and AM251 treated larvae<sup>45</sup>.  
218 Further, both inhibitors were used at nanomolar range in our study, which is considered modest  
219 and ensuring a level of specificity towards their respective receptors (AM251, IC50= 8 nM  
220 towards CB1R; AM630, IC50= 31.2 nM towards CB2R). As described previously, the  
221 experimental timeline is as depicted in figure 2b with CBD being added immediately after  
222 AM251 and AM630. When analyzing CaMPARI activity, our results revealed that the CBD-  
223 mediated reduction in neural activity could not be completely prevented with concentrations  
224 from 0.1 to 10 nM AM251 or AM630 in the presence of 3 µg/ml of CBD (Fig. 4a-d). In  
225 contrast, CBD-mediated reduction of locomotor activity was prevented with a concentration of

226 AM251 as low as 1 nM (Fig. 4e) or with 10 nM of AM630 (Fig. 4f). In the absence of CBD,  
227 when using the maximum dose (10 nM) of AM251 or AM630, neither inhibitor had an effect  
228 (Fig. 4g,h). This finding excludes the possibility that the effects of AM251 or AM630 on  
229 locomotion were independent of CBD and rather specific towards CB1R and CB2R,  
230 respectively. Overall, this suggests a role for both CB1R and CB2R receptors in CBD-mediated  
231 effects on locomotor activity. In sum, inhibiting CB1R and CB2R can ameliorate the negative  
232 impacts of early CBD on late CNS function, at least with respect to locomotion.

233

## 234 **Discussion**

235 In some jurisdictions, including Canada, cannabis has been legalized despite the lack of  
236 mechanistic understanding and health implications. Cannabis consumption has increased in the  
237 past decade<sup>46,47</sup> and reports emerged associating prenatal cannabis consumption with stillbirths  
238 and autism spectrum disorder, a neurodevelopmental syndrome<sup>48,49</sup>. Yet, cannabis and CBD oil  
239 have been used by consumers to treat labor pain<sup>50</sup>. In animal models, such as rats and chicken,  
240 cannabis has been shown to have detrimental effects on developing embryos<sup>10,51</sup>. Intriguingly,  
241 more recently, new evidence revealed that exposure to not only the more widely studied THC,  
242 but also CBD, during gastrulation impacts the overall development in zebrafish<sup>13</sup>. Interestingly,  
243 the effect of the two key cannabinoids, CBD and THC, were delayed, and observed much later in  
244 the development after the exposure had ended.

245 *In vitro*, CBD and THC can function through CB1R and CB2R, which are expressed in  
246 neuronal tissue<sup>17-25</sup>. Our goal was to specifically investigate the effects of CBD, how it might  
247 interact with the more widely studied THC during early development and characterize the impact

248 on neural activity *in vivo* on a mechanistic level. For our study, we implemented CaMPARI  
249 transgenic zebrafish as a read-out of neural activity and supplemented this approach by  
250 measuring the locomotor activity of the same larvae. CaMPARI has proven to be a simple and  
251 economical neural integrator that can be optimized in a well-format using our animal model. We  
252 found that neural activity was reduced later in zebrafish development upon brief exposure of not  
253 only THC, but also CBD early in development. Surprisingly, CBD had similar impacts on neural  
254 activity at lower concentrations compared to THC. Notably, the impact of CBD was increased by  
255 sub-effective doses of THC. Our data quantifying locomotion, suggested that the CBD-mediated  
256 effect involves CB1R and CB2Rs.

257 We optimized CaMPARI such that this innovation can be used for large number of  
258 samples to screen compounds in future studies. Zebrafish larvae can be deployed in a 96-well  
259 set-up quantifying locomotion<sup>39,52-56</sup>. Nevertheless, locomotor activity is not a direct  
260 measurement of neural activity. Calcium sensors, such as the GCaMP series<sup>57,58</sup>, the more  
261 recently introduced GECO<sup>59,60</sup>, and CaMPARI, are more accurate. CaMPARI provides a  
262 temporal-snapshot of neural activity in the freely swimming animal, which can be anesthetized  
263 and imaged after the experiment<sup>34</sup>. Furthermore, the ratiometric red/green signals are imaged  
264 together and mitigate inter-individual differences in expression levels or focal plane. We  
265 optimized conditions for a well-plate set-up analyzing neural activity in the optic tectum and  
266 hindbrain. Unfortunately, less defined areas or specific neurons could not be quantified. Effects  
267 on motor axons will be detected by our behavioural assay. In general, there seems to be a good  
268 correlation between neural activity measured by CaMPARI and locomotor activity<sup>61,62</sup>. However,  
269 some findings may be more sensitive towards one assay vs the other, as described above.  
270 Furthermore, when interpreting our data as neural activity, it is important to consider that when

271 anesthetized a clear red to green CaMPARI ratio can be still measured. This is unlikely due to  
272 autofluorescence because larvae that were not photoconverted yielded zero CaMPARI activity.  
273 We cannot exclude the possibility that due to longer photoconversion some CaMPARI has  
274 converted into the red fluorescence version even when anesthetized. It is well established that  
275 when anesthetized with MS-222, neurons are barely active<sup>63,64</sup>. Indeed, our behavioural assay  
276 shows no locomotion in the presence of MS-222 and we used this assay as a supplement in this  
277 study. We believe this method is a suitable technique to measure substantial changes in neural  
278 activity in the larger parts of the zebrafish CNS. For future studies in connection to epilepsy this  
279 innovation may be particularly helpful as some studies use convulsants, PTZ or 4-AP, to  
280 simulate seizure<sup>62,65</sup>. We found that both, PTZ and 4-AP, induce CaMPARI activity. Considering  
281 the advantages, this method outweighs its limitation and could serve for future studies, especially  
282 in connection with epilepsy.

283         We have considered several competing technologies prior to designing this study, in  
284 hopes that we can build upon and complement these potent approaches. Other than behavioural  
285 assays described above, the GCaMP series has been of interest<sup>57,58</sup>. However, the larvae have to  
286 be analyzed with high-resolution live microscopy during the experiment and movement of the  
287 larvae would add considerable variability. The assays would be data-intensive and technically  
288 challenging, where large sample sizes and different experimental groups are difficult to obtain  
289 (especially *in vivo*). Additionally, we were still interested in measuring outputs from freely  
290 behaving animals as constraining them for imaging likely impacts the results and is time-  
291 consuming. Other widely used markers for neural activity include the immediate-early gene *c-fos*  
292 and phosphorylation of ERK<sup>65,66</sup>. However, CaMPARI is more temporal specific due to  
293 immediate photoconversion. In addition, both markers are not only less tissue specific, but also

294 respond to stress and other factors. The *elavl3* promoter that drives CaMPARI ensures CNS-  
295 specific expression. Overall, CaMPARI is a practical direct output of neural activity and thus the  
296 chosen innovation for this study.

297 Both CBD and THC have been implicated in embryonic development including abnormal  
298 changes to neurons. Delayed abnormalities after early exposure of key cannabinoids have only  
299 recently been investigated<sup>13</sup>. Here, early exposure of CBD and THC during the first 10 hours of  
300 embryonic development reduced neural activity when measured 4 days later, in a dose-dependent  
301 manner. These later effects may be due to abnormal neurodevelopment and/or the slow release of  
302 the cannabinoids from the tissue due to their lipophilic nature. Consistent with this finding,  
303 zebrafish larvae with a similar exposure (5-10 hpf) to cannabinoids have shown effects that could  
304 be due abnormal development (at 5 dpf). This was not exclusive to neurons, but included other  
305 changes such as morphological abnormalities, decreased survival rate, decreased mEPCs activity  
306 (may relate to muscle development), decreased heart rate and delayed hatching<sup>13</sup>. Considering  
307 the specific time-window of exposure (first 10 hours in development), an abrupt effect on the  
308 developmental program including neurons seems plausible. Interestingly, CBD seemed to impact  
309 neural activity at a lower concentration than THC, which also aligns with our previous study<sup>13</sup>. It  
310 is important to acknowledge that CBD consumption has been documented to help with seizures  
311 and cancer by reducing pain<sup>67,68</sup>. Nevertheless, our study suggests caution during pregnancies.

312 Considering that cannabis contains large proportions of both CBD and THC, we looked  
313 at the effects of these two compounds in combination and found a more potent effect in  
314 decreasing neural activity. Reticulospinal neurons in the hindbrain of the zebrafish control motor  
315 neurons during swimming<sup>42,69</sup>. In line with a reduction in locomotion, we observed reduced  
316 staining when exposed to both cannabinoids, suggesting that the reticulospinal neuronal integrity

317 was compromised. However, this finding did not explain why locomotor activity was mainly  
318 influenced by CBD. This could be due in part that CBD has a greater effect at lower  
319 concentration than THC. The effect of CBD may be amplified by effecting motor neurons and  
320 potentially muscle development. Overall, these findings were surprising, because CBD was  
321 found to negate the effects of THC on CB1R<sup>27</sup>. One possibility is that at higher concentrations  
322 both, CBD and THC, affect the developmental program. This could explain the abnormal  
323 morphologies reported previously<sup>13</sup>. We have observed similar morphologies using higher  
324 concentrations of CBD and/or THC. Thus, it is of no surprise that abnormal morphologies  
325 impacted neural activity and locomotion. Nevertheless, because at 2 µg/mL we found a  
326 significant reduction in neural activity, but no morphological change was observed previously at  
327 that concentration<sup>13</sup>, it is unlikely that neural activity is affected by morphological changes alone.  
328 In short, we believe that although in physiological range, high concentrations of CBD and THC  
329 during embryonic development disrupt proper growth and neuron function with similar  
330 consequences and thus the effects of CBD and THC are same. This could result in overriding the  
331 negating effects of CBD. In contrast, at lower concentrations and in fully developed brains the  
332 impact of CBD and THC is different. Indeed, several receptors have been shown to have  
333 different affinities to THC and CBD<sup>25</sup>. A second possibility, therefore, is that at high  
334 concentration CBD and THC affect receptors other than CB1R and CB2R. This could explain  
335 why inhibiting CB1R and CB2R did not fully prevent CBD-mediated reduction of neural  
336 activity, as further discussed below.

337         At this stage, it is unclear what mechanism(s) account for the reduction in neural activity  
338 later in development when embryos are exposed briefly to CBD and THC in the first hours after  
339 fertilization. In this study, we were especially interested in the less widely studied CBD. Using

340 HEK cells several receptor candidates have been identified showing to interact with CBD<sup>25</sup>. A  
341 recent study supports a functional role of CB1R and CB2R in zebrafish<sup>32</sup>. Here, by inhibiting  
342 CB1R, and CB2R, we found that the reduction in locomotor activity mediated by CBD was  
343 partially prevented at nanomolar concentrations of the inhibitors. This suggests that,  
344 mechanistically, CBD acts through both receptors. Previous studies have implied that CBD may  
345 bind to both CB1R and CB2R *in vitro*<sup>25</sup> and our study is in support that these interactions may be  
346 important *in vivo*. In line with our findings, CBD has been shown to cause abnormal craniofacial  
347 and brain development in mice and zebrafish, which seems to be mediated through CB1R and  
348 the hedgehog signaling pathway<sup>16</sup>. Whether CB2R can mediate its effects through the same  
349 pathway remains to be determined. An explanation to why inhibiting CB1R and CB2R did  
350 prevent the maximum effect of CBD, which is delayed, could relate to the fact that the CB1R  
351 and CB2R are expressed very early in development and found on stem cell progenitor cells<sup>61</sup>. As  
352 mentioned above, an early effect may impact the developmental program such that changes  
353 persist until later, even if cannabinoids are no longer present in the circulation. Such changes  
354 may not be specific to the CNS as CB receptors are not only expressed in neuronal progenitor  
355 cells, but in stem cells forming other types of tissues<sup>70</sup>. This could explain our previous findings  
356 where CBD affected heart-rate and overall morphology after 5 dpf when exposed only briefly  
357 during gastrulation<sup>11</sup>. The CBD-mediated reduction in neural activity was not prevented when  
358 either CB1 or CB2Rs were inhibited. While the reason for this is unclear, it could relate that the  
359 effects of CBD are larger outside the optic tectum and the hindbrain, thus more visible when  
360 quantifying locomotion. As described above, our CaMPARI assay in well-format is not suitable  
361 to resolve motor axons in detail, which have been shown to be affected previously<sup>13</sup>. It is also  
362 possible that other receptors such as TRPV1 are involved<sup>26</sup>, but this needs further investigation.



363 Overall, both CBD and THC exposure during embryonic stages had a negative impact on  
364 later neural activity, which was additive when combined. Together, this could mean that the  
365 impact of cannabis on early development is higher than using isolated compounds and profound.  
366 Our findings also support an *in vivo* mechanism of CBD functioning through CB1R and CB2R.  
367 We believe this study opens up a new path for investigating detailed mechanisms, including  
368 other receptors, in specific neurons that are affected by cannabinoid toxicity early in  
369 development and persist. The accumulating evidence for prenatal cannabis consumption having  
370 negative consequences on neurodevelopmental disorders in the offspring<sup>3</sup> has to be considered.  
371 As the recreational use is becoming legalized and socially acceptable, more studies are warranted  
372 to not only fully understand the impact on human development, but also the mechanisms of the  
373 diseases.

374

## 375 **METHODS**

### 376 **Animal Ethics and exposure to drugs**

377 Zebrafish maintenance was approved by the Animal Care & Use Committee: Biosciences  
378 at the University of Alberta and operated under the guidelines of the Canadian Council of  
379 Animal Care. The fish were maintained in the University of Alberta fish facility at 28°C under a  
380 14/10 light/dark cycle as previously described<sup>71</sup> and all authors complied with ARRIVE (Animal  
381 Research: Reporting of In Vivo Experiments) guidelines<sup>72</sup>.

382 CaMPARI transgenic zebrafish were outcrossed with *Casper* strains not carrying the  
383 transgene. For experimental set up, embryos were randomly collected and placed in egg water  
384 (60 µg/ml Instant Ocean) in groups of 20 embryos as early as practically possible within 0.5 hpf.

385 Stock solutions of CBD and THC were obtained from Sigma at 1 mg/ml dissolved in methanol.  
386 Receptor inhibitors AM251 (Selleck Chemicals, Houston, TX, USA) and AM630 (Adooq  
387 Bioscience, Irvine, CA, USA) were dissolved in DMSO. Accordingly, zebrafish embryos were  
388 treated with vehicle or compounds as close to 1 hpf as practically possible and removed towards  
389 the end of gastrulation (10 hpf). Within experiments all treatments contained the same amount of  
390 methanol or DMSO, specific percentages are indicated in the figure legends. Compounds were  
391 removed with several washes and egg water was replaced every day until CaMPARI analysis.  
392 Not all larvae carried the transgene and were screened for green fluorescence. An increase in  
393 mortality and abnormal morphology was observed when treated with higher doses of CBD or  
394 THC, as reported previously<sup>13</sup>.

395

### 396 **Engineering CaMPARI transgenic zebrafish for integrative calcium imaging.**

397 Zebrafish expressing CaMPARI, i.e. the Tg[*elavl3*:CaMPARI (W391F+V398L)]<sup>ua3144</sup>  
398 line were generated as described previously<sup>61,62</sup>. We re-derived CaMPARI fish in response to a  
399 federal moratorium limiting zebrafish import into Canada<sup>73</sup>.

400

### 401 **CaMPARI photoconversion**

402 For photoconversion, bright green Tg[*elavl3*:CaMPARI (W391F+V398L)]<sup>ua3144</sup> larvae at  
403 4 dpf were placed in a 96-well plate containing 150 µl egg water (made as previously described<sup>71</sup>)  
404 and acclimatized for 2 h. The central 48 wells of the plate were exposed to 405 nm LED array  
405 (Loctite) for 300 sec at a distance of 10 cm. LED array illuminated the plates entirely and evenly.  
406 The plates were floating in water at room temperature to ensure that the larvae did not overheat.

407 For imaging, the larvae were anesthetized in 0.24 mg/mL tricaine methanesulfonate (MS-222,  
408 Sigma) following photoconversion. MS-222 was washed out and zebrafish were rested for a day  
409 prior analysis for locomotor activity.

410

### 411 **CaMPARI analysis**

412 The ratio of red to green fluorescent emissions (red photoconverted CaMPARI in ratio to  
413 green CaMPARI) was interpreted as relative neural activity, as previously defined<sup>34</sup>. Images  
414 were objectively obtained with an InCell 2000 microscope (GE Healthcare, US). 96-well plates  
415 were run using FITC (1 second exposure) and dsRed (2 second exposure) channels. Blinded  
416 experimentalists used ImageJ to quantify the fluorescence mean of the red (dsRed) and green  
417 (FITC) channels. The area of the optic and hindbrain area were quantified as those regions were  
418 most consistent in the view. A mask was applied to exclude noise outside of the CNS.

419

### 420 **Quantifying Locomotor activity**

421 The same zebrafish larvae being placed in the 96-well plate the day prior for CaMPARI  
422 analysis were objectively quantified for locomotion using Basler GenICaM (Basler acA 1300-  
423 60) scanning camera (75-mm f2.8 C-mount lens) and EthoVision<sup>®</sup> XT-11.5 software by Noldus  
424 (Wageningen, Netherlands) as described previously<sup>74</sup>. Briefly, larvae were acclimatized for 3 h  
425 and one hour of movement was recorded from each individual larvae in each well. Beneath the  
426 plate an infrared backlight source was located and the scanning camera above. Activity was  
427 defined here as % pixel change within well between frames (recordings were at 25 frames per  
428 second) and quantified with EthoVision<sup>®</sup> XT-11.5 software. This set-up allowed to see whether

429 there is a correlation between level of neural activity and the the mean activity % within a  
430 swimbout (swimbout size). Swimbout size was shown to increase in response to the convulsant  
431 PTZ previously<sup>52</sup> and here it can be a useful marker for neural activity. Transparent *Casper* strain  
432 zebrafish<sup>75</sup> were unable to be tracked as usual with Noldus. Therefore, quantification of  
433 swimbouts provided an additional advantage. Clear movement was detected above the noise  
434 treshold due to movement of the pigmented eyes. Although the % swimbout is small, reliable  
435 measurements were obtained. Only clear swimbouts were quantified, which were set above a  
436 treshold of 0.1 % of activity. Figure 1f shows that measuring the mean activity of a swimbout is  
437 a useful tool in obtaining output that is clearly diminished in presence of MS-222. In addition,  
438 the output also shows sensitivity in freely swimming larvae.

439

#### 440 **RMO44 staining**

441 The zebrafish used in this experiment were of the Tuebingen Longfin strain. Set-up was  
442 similar as described above. Following the experiment, larvae were stained with anti-RMO44  
443 (Thermo Fisher Scientific, Waltham, MA, USA) and imaged using a Zeiss LSM 710 confocal  
444 microscope (Oberkochen, Germany) as described elsewhere<sup>76</sup>.

445

#### 446 **Statistics**

447 GraphPad Prism Software (Version 7, GraphPad, San Diego, CA) was used to analyze statistics  
448 from data obtained from our CaMPARI assay or tracking locomotor activity. All the data were  
449 presented as mean  $\pm$ SEM (standard error of the mean). Statistical significance of  $p < 0.05$  was  
450 determined using a non-parametric t-test between two groups followed by a Mann-Whitney

451 analysis, if appropriate. Multiple groups were compared using One-Way ANOVA with Dunnett's  
452 multiple comparisons test. Pearson r from correlation analysis was also determined where  
453 indicated.

454  
455  
456  
457  
458  
459  
460  
461  
462  
463  
464  
465  
466  
467  
468  
469  
470  
471  
472  
473  
474  
475  
476  
477  
478  
479  
480  
481  
482  
483  
484  
485  
486  
487  
488  
489  
490  
491  
492  
493

494 **References**

- 495
- 496 1. Degenhardt L, Chiu W-T, Sampson N, Kessler RC, Anthony JC, Angermeyer M, et al.  
497 Toward a global view of alcohol, tobacco, cannabis, and cocaine use: findings from the  
498 WHO World Mental Health Surveys. *PLoS Med.* 2008;5:e141.  
499
  - 500 2. Winek CL. Some historical aspects of marijuana. *Clin Toxicol.* 1977;10:243–53.  
501
  - 502 3. Bérard A. The importance of generating more data on cannabis use in pregnancy. *Nat Med.*  
503 2020;26:1515–6.  
504
  - 505 4. Fergusson DM, Horwood LJ, Northstone K, ALSPAC Study Team. Avon Longitudinal  
506 Study of Pregnancy and Childhood. Maternal use of cannabis and pregnancy outcome.  
507 *BJOG.* 2002;109:21–7.  
508
  - 509 5. Gómez M, Hernández M, Johansson B, de Miguel R, Ramos JA, Fernández-Ruiz J. Prenatal  
510 cannabinoid and gene expression for neural adhesion molecule L1 in the fetal rat brain. *Brain*  
511 *Res Dev Brain Res.* 2003;147:201–7.  
512
  - 513 6. Hutchings DE, Martin BR, Gamagaris Z, Miller N, Fico T. Plasma concentrations of delta-9-  
514 tetrahydrocannabinol in dams and fetuses following acute or multiple prenatal dosing in rats.  
515 *Life Sci.* 1989;44:697–701.  
516
  - 517 7. Young-Wolff KC, Tucker L-Y, Alexeeff S, Armstrong MA, Conway A, Weisner C, et al.  
518 Trends in Self-reported and Biochemically Tested Marijuana Use Among Pregnant Females  
519 in California From 2009-2016. *JAMA.* 2017;318:2490.  
520
  - 521 8. van Gelder MMHJ, Reefhuis J, Caton AR, Werler MM, Druschel CM, Roeleveld N.  
522 Characteristics of pregnant illicit drug users and associations between cannabis use and  
523 perinatal outcome in a population-based study. *Drug and Alcohol Dependence.*  
524 2010;109:243–7.  
525
  - 526 9. Singer L, Tokish H, Park F, Campisi C, Milanaik RL. The cannabidiol conundrum: potential  
527 benefits and risks of cannabidiol products for children. *Curr Opin Pediatr.* 2020;32:198–205.  
528
  - 529 10. Friedrich J, Khatib D, Parsa K, Santopietro A, Gallicano GI. The grass isn't always greener:  
530 The effects of cannabis on embryological development. *BMC Pharmacol Toxicol.* 2016 Sep  
531 29;17:45.  
532
  - 533 11. Morris CV, DiNieri JA, Szutorisz H, Hurd YL. Molecular mechanisms of maternal cannabis  
534 and cigarette use on human neurodevelopment. *Eur J Neurosci.* 2011;34:1574–83.  
535
  - 536 12. Navarro M, Rubio P, de Fonseca FR. Behavioural consequences of maternal exposure to  
537 natural cannabinoids in rats. *Psychopharmacology (Berl).* 1995;122:1–14.  
538

- 539 13. Ahmed KT, Amin MR, Shah P, Ali DW. Motor neuron development in zebrafish is altered  
540 by brief (5-hr) exposures to THC ( $\Delta^9$ -tetrahydrocannabinol) or CBD (cannabidiol) during  
541 gastrulation. *Sci Rep.* 2018;8:10518.  
542
- 543 14. Parker LA, Rock EM, Limebeer CL. Regulation of nausea and vomiting by cannabinoids. *Br*  
544 *J Pharmacol.* 2011;163:1411–22.  
545
- 546 15. Roberson EK, Patrick WK, Hurwitz EL. Marijuana use and maternal experiences of severe  
547 nausea during pregnancy in Hawai'i. *Hawaii J Med Public Health.* 2014;73:283–7.  
548
- 549 16. Fish EW, Murdaugh LB, Zhang C, Boschen KE, Boa-Amponsem O, Mendoza-Romero HN,  
550 et al. Cannabinoids Exacerbate Alcohol Teratogenesis by a CB1-Hedgehog Interaction. *Sci*  
551 *Rep.* 2019;9:16057.  
552
- 553 17. Pertwee RG. Ligands that target cannabinoid receptors in the brain: from THC to  
554 anandamide and beyond. *Addict Biol.* 2008;13:147–59.  
555
- 556 18. Herkenham M, Lynn AB, Little MD, Johnson MR, Melvin LS, de Costa BR, et al.  
557 Cannabinoid receptor localization in brain. *Proc Natl Acad Sci U S A.* 1990;87:1932–6.  
558
- 559 19. Watson S, Chambers D, Hobbs C, Doherty P, Graham A. The endocannabinoid receptor,  
560 CB1, is required for normal axonal growth and fasciculation. *Mol Cell Neurosci.*  
561 2008;38:89–97.  
562
- 563 20. Kano M, Ohno-Shosaku T, Hashimotodani Y, Uchigashima M, Watanabe M.  
564 Endocannabinoid-mediated control of synaptic transmission. *Physiol Rev.* 2009;89:309–80.  
565
- 566 21. Smita K, Sushil Kumar V, Premendran JS. Anandamide: an update. *Fundam Clin Pharmacol.*  
567 2007;21:1–8.  
568
- 569 22. Benarroch E. Endocannabinoids in basal ganglia circuits: implications for Parkinson disease.  
570 *Neurology.* 2007;69:306–9.  
571
- 572 23. Stempel AV, Stumpf A, Zhang H-Y, Özdoğan T, Pannasch U, Theis A-K, et al. Cannabinoid  
573 Type 2 Receptors Mediate a Cell Type-Specific Plasticity in the Hippocampus. *Neuron.*  
574 2016;90:795–809.  
575
- 576 24. Liu Q-R, Canseco-Alba A, Zhang H-Y, Tagliaferro P, Chung M, Dennis E, et al.  
577 Cannabinoid type 2 receptors in dopamine neurons inhibits psychomotor behaviors, alters  
578 anxiety, depression and alcohol preference. *Sci Rep.* 2017;7:17410.  
579
- 580 25. McPartland JM, Duncan M, Di Marzo V, Pertwee RG. Are cannabidiol and  $\Delta(9)$ -  
581 tetrahydrocannabivarin negative modulators of the endocannabinoid system? A systematic  
582 review. *Br J Pharmacol.* 2015;172:737–53.  
583

- 584 26. Gray RA, Whalley BJ. The proposed mechanisms of action of CBD in epilepsy. *Epileptic*  
585 *Disorders*. 2020;22:S10–5.  
586
- 587 27. Laprairie RB, Bagher AM, Kelly MEM, Denovan □ Wright EM. Cannabidiol is a negative  
588 allosteric modulator of the cannabinoid CB1 receptor. *Br J Pharmacol*. 2015;172:4790–805.  
589
- 590 28. Ibeas Bih C, Chen T, Nunn AVW, Bazelat M, Dallas M, Whalley BJ. Molecular Targets of  
591 Cannabidiol in Neurological Disorders. *Neurotherapeutics*. 2015;12:699–730.  
592
- 593 29. Ryberg E, Larsson N, Sjögren S, Hjorth S, Hermansson N-O, Leonova J, et al. The orphan  
594 receptor GPR55 is a novel cannabinoid receptor. *Br J Pharmacol*. 2007;152:1092–101.  
595
- 596 30. Akhtar MT, Ali S, Rashidi H, van der Kooy F, Verpoorte R, Richardson MK. Developmental  
597 effects of cannabinoids on zebrafish larvae. *Zebrafish*. 2013;10:283–93.  
598
- 599 31. Oltrabella F, Melgoza A, Nguyen B, Guo S. Role of the endocannabinoid system in  
600 vertebrates: Emphasis on the zebrafish model. *Dev Growth Differ*. 2017;59:194–210.  
601
- 602 32. Sufian MS, Amin MR, Kanyo R, Allison WT, Ali DW. CB1 and CB2 receptors play  
603 differential roles in early zebrafish locomotor development. *J Exp Biol*. 2019;222(Pt 16).  
604
- 605 33. Lam CS, Rastegar S, Strähle U. Distribution of cannabinoid receptor 1 in the CNS of  
606 zebrafish. *Neuroscience*. 2006;138:83–95.  
607
- 608 34. Fosque BF, Sun Y, Dana H, Yang C-T, Ohyama T, Tadross MR, et al. Neural circuits.  
609 Labeling of active neural circuits in vivo with designed calcium integrators. *Science*.  
610 2015;347:755–60.  
611
- 612 35. Huestis MA. Human cannabinoid pharmacokinetics. *Chem Biodivers*. 2007;4:1770–804.  
613
- 614 36. Rohleder C, Müller JK, Lange B, Leweke FM. Cannabidiol as a Potential New Type of an  
615 Antipsychotic. A Critical Review of the Evidence. *Front Pharmacol*. 2016;7:422.  
616
- 617 37. Iffland K, Grotenhermen F. An Update on Safety and Side Effects of Cannabidiol: A Review  
618 of Clinical Data and Relevant Animal Studies. *Cannabis Cannabinoid Res*. 2017;2:139  
619
- 620 38. Ellis LD, Seibert J, Soanes KH. Distinct models of induced hyperactivity in zebrafish larvae.  
621 *Brain Research*. 2012;1449:46–59.  
622
- 623 39. Rihel J, Prober DA, Arvanites A, Lam K, Zimmerman S, Jang S, et al. Zebrafish behavioral  
624 profiling links drugs to biological targets and rest/wake regulation. *Science*. 2010;327:348–  
625 51.  
626
- 627 40. Zhang F, Qin W, Zhang J-P, Hu C-Q. Antibiotic Toxicity and Absorption in Zebrafish Using  
628 Liquid Chromatography-Tandem Mass Spectrometry. *PLOS ONE*. 2015;10:e0124805.



- 629
- 630 41. Brox S, Ritter AP, Küster E, Reemtsma T. A quantitative HPLC–MS/MS method for  
631 studying internal concentrations and toxicokinetics of 34 polar analytes in zebrafish (*Danio*  
632 *rerio*) embryos. *Anal Bioanal Chem.* 2014;406:4831–40.  
633
- 634 42. Banote RK, Edling M, Eliassen F, Kettunen P, Zetterberg H, Abramsson A.  $\beta$ -Amyloid  
635 precursor protein-b is essential for Mauthner cell development in the zebrafish in a Notch-  
636 dependent manner. *Developmental Biology.* 2016;413:26–38.  
637
- 638 43. Braissant O, Henry H, Villard A-M, Zurich M-G, Loup M, Eilers B, et al. Ammonium-  
639 Induced Impairment of Axonal Growth Is Prevented through Glial Creatine. *J Neurosci.*  
640 2002;22:9810–20.  
641
- 642 44. Acevedo-Canabal A, Colón-Cruz L, Rodriguez-Morales R, Varshney GK, Burgess S,  
643 González-Sepúlveda L, et al. Altered Swimming Behaviors in Zebrafish Larvae Lacking  
644 Cannabinoid Receptor 2. *Cannabis and Cannabinoid Research.* 2019;4:88–101.  
645
- 646 45. Luchtenburg FJ, Schaaf MJM, Richardson MK. Functional characterization of the  
647 cannabinoid receptors 1 and 2 in zebrafish larvae using behavioral analysis.  
648 *Psychopharmacology (Berl).* 2019;236:2049–58.  
649
- 650 46. Canada Health. Canadian Tobacco Alcohol and Drugs (CTADS) Survey: 2017 summary  
651 2018 [https://www.canada.ca/en/health-canada/services/canadian-tobacco-alcohol-drugs-](https://www.canada.ca/en/health-canada/services/canadian-tobacco-alcohol-drugs-survey/2017-summary.html#n3)  
652 [survey/2017-summary.html#n3](https://www.canada.ca/en/health-canada/services/canadian-tobacco-alcohol-drugs-survey/2017-summary.html#n3) Accessed 30 November 2020  
653
- 654 47. Statistics Canada. National Cannabis Survey, first quarter 2019. 2019;(11):15.  
655
- 656 48. Varner MW, Silver RM, Rowland Hogue CJ, Willinger M, Parker CB, Thorsten VR, et al.  
657 Association between stillbirth and illicit drug use and smoking during pregnancy. *Obstet*  
658 *Gynecol.* 2014;123:113–25.  
659
- 660 49. Corsi DJ, Donelle J, Sucha E, Hawken S, Hsu H, El-Chaâr D, et al. Maternal cannabis use in  
661 pregnancy and child neurodevelopmental outcomes. *Nat Med.* 2020;26:1536–40.  
662
- 663 50. Sarrafpour S, Urits I, Powell J, Nguyen D, Callan J, Orhurhu V, et al. Considerations and  
664 Implications of Cannabidiol Use During Pregnancy. *Curr Pain Headache Rep.* 2020;24:38.  
665
- 666 51. Gustafsson SB, Jacobsson SOP. Effects of cannabinoids on the development of chick  
667 embryos in ovo. *Scientific Reports.* 2019;9:13486.  
668
- 669 52. Hoffman EJ, Turner KJ, Fernandez JM, Cifuentes D, Ghosh M, Ijaz S, et al. Estrogens  
670 Suppress a Behavioral Phenotype in Zebrafish Mutants of the Autism Risk Gene, *CNTNAP2.*  
671 *Neuron.* 2016;89:725–33.  
672

- 673 53. MacRae CA, Peterson RT. Zebrafish as tools for drug discovery. *Nat Rev Drug Discov.*  
674 2015;14:721–31.  
675
- 676 54. Baraban SC, Dinday MT, Hortopan GA. Drug screening in *Scn1a* zebrafish mutant identifies  
677 clemizole as a potential Dravet syndrome treatment. *Nature Communications.* 2013;4:2410.  
678
- 679 55. Bose P, Tremblay E, Maois C, Narasimhan V, Armstrong GAB, Liao M, et al. The Novel  
680 Small Molecule TRVA242 Stabilizes Neuromuscular Junction Defects in Multiple Animal  
681 Models of Amyotrophic Lateral Sclerosis. *Neurotherapeutics.* 2019;16:1149–66.  
682
- 683 56. Ibhazehiebo K, Gavrilovici C, de la Hoz CL, Ma S-C, Rehak R, Kaushik G, et al. A novel  
684 metabolism-based phenotypic drug discovery platform in zebrafish uncovers HDACs 1 and 3  
685 as a potential combined anti-seizure drug target. *Brain.* 2018;141:744–61.  
686
- 687 57. Mank M, Griesbeck O. Genetically Encoded Calcium Indicators. *Chem Rev.*  
688 2008;108:1550–64.  
689
- 690 58. Akerboom J, Chen T-W, Wardill TJ, Tian L, Marvin JS, Mutlu S, et al. Optimization of a  
691 GCaMP calcium indicator for neural activity imaging. *J Neurosci.* 2012;32:13819–40.  
692
- 693 59. Shaner NC, Lambert GG, Chammas A, Ni Y, Cranfill PJ, Baird MA, et al. A bright  
694 monomeric green fluorescent protein derived from *Branchiostoma lanceolatum*. *Nat*  
695 *Methods.* 2013;10:407–9.  
696
- 697 60. Zarowny L, Aggarwal A, Rutten VMS, Kolb I, GENIE Project, Patel R, et al. Bright and  
698 High-Performance Genetically Encoded Ca<sup>2+</sup> Indicator Based on mNeonGreen Fluorescent  
699 Protein. *ACS Sens.* 2020;5:1959–68.  
700
- 701 61. Alyenbaawi H, Kanyo R, Locskai LF, Kamali-Jamil R, DuVal MG, Bai Q, et al. Seizures are  
702 a druggable mechanistic link between TBI and subsequent tauopathy. *bioRxiv.* 14 May 2020  
703 (accepted in eLife). <https://doi.org/10.1101/2020.05.12.091819>.  
704
- 705 62. Kanyo R, Wang CK, Locskai LF, Li J, Allison WT, Kurata HT. Functional and behavioral  
706 signatures of Kv7 activator drug subtypes. *Epilepsia.* 2020;61:1678-1690  
707
- 708 63. Medler S. Anesthetic MS-222 eliminates nerve and muscle activity in frogs used for  
709 physiology teaching laboratories. *Adv Physiol Educ.* 2019;43:69–75.  
710
- 711 64. Hedrick MS, Winmill RE. Excitatory and inhibitory effects of tricaine (MS-222) on fictive  
712 breathing in isolated bullfrog brain stem. *American Journal of Physiology-Regulatory,*  
713 *Integrative and Comparative Physiology.* 2003;284:R405–12.  
714
- 715 65. Leighton PLA, Kanyo R, Neil GJ, Pollock NM, Allison WT. Prion gene paralogs are  
716 dispensable for early zebrafish development and have nonadditive roles in seizure  
717 susceptibility. *J Biol Chem.* 2018;293:12576–92.

- 718  
719 66. Özcan, Güliz Gürel, Sumi Lim, Patricia LA Leighton, W. Ted Allison, and Jason Rihel.  
720 “Sleep Is Bi-Directionally Modified by Amyloid Beta Oligomers.” *ELife* 9 (14 2020).  
721 <https://doi.org/10.7554/eLife.53995>.  
722  
723 67. Perucca E. Cannabinoids in the Treatment of Epilepsy: Hard Evidence at Last? *J Epilepsy*  
724 *Res.* 2017;7:61–76.  
725  
726 68. Russo EB. Cannabinoids in the management of difficult to treat pain. *Ther Clin Risk Manag.*  
727 2008;4:245–59.  
728  
729 69. Kohashi T, Nakata N, Oda Y. Effective Sensory Modality Activating an Escape Triggering  
730 Neuron Switches during Early Development in Zebrafish. *J Neurosci.* 2012;32:5810–20.  
731  
732 70. Galve-Roperh I, Chiurchiù V, Díaz-Alonso J, Bari M, Guzmán M, Maccarrone M.  
733 Cannabinoid receptor signaling in progenitor/stem cell proliferation and differentiation.  
734 *Progress in Lipid Research.* 2013;52:633–50.  
735  
736 71. Westerfield, M. *The Zebrafish Book. A Guide for the Laboratory Use of Zebrafish (Danio*  
737 *rerio).* University of Oregon Press:Eugene, OR ;2000.  
738  
739 72. Sert NP du, Hurst V, Ahluwalia A, Alam S, Avey MT, Baker M, et al. The ARRIVE  
740 guidelines 2.0: Updated guidelines for reporting animal research. *PLOS Biology.*  
741 2020;18:e3000410.  
742  
743 73. Hanwell D, Hutchinson SA, Collymore C, Bruce AE, Louis R, Ghalami A, et al. Restrictions  
744 on the Importation of Zebrafish into Canada Associated with Spring Viremia of Carp Virus.  
745 *Zebrafish.* 2016;13 Suppl 1:S153-163.  
746  
747 74. Kanyo R, Leighton PLA, Neil GJ, Locskai LF, Allison WT. Amyloid- $\beta$  precursor protein  
748 mutant zebrafish exhibit seizure susceptibility that depends on prion protein. *Exp Neurol.*  
749 2020;328:113283.  
750  
751 75. White RM, Sessa A, Burke C, Bowman T, LeBlanc J, Ceol C, et al. Transparent adult  
752 zebrafish as a tool for in vivo transplantation analysis. *Cell Stem Cell.* 2008;2:183–9.  
753  
754 76. Amin MR, Ahmed KT, Ali DW. Early Exposure to THC Alters M-Cell Development in  
755 Zebrafish Embryos. *Biomedicines.* 4 January 2020;8.  
756 <https://doi.org/10.3390/biomedicines8010005>  
757  
758  
759  
760

761

762 **ACKNOWLEDGEMENTS**

763 This study was supported by grants to W.T. Allison from Alberta Prion Research Institute-  
764 Alberta Innovates BioSolutions and the Alzheimer Society of Alberta and the Northwest  
765 Territories, and to D.W. Ali from the Natural Sciences and Engineering Research Council of  
766 Canada and Alberta Innovates mCannabis. L.F. Locskai was supported by undergraduate  
767 studentships from Natural Sciences and Engineering Research Council of Canada and from  
768 Alberta Innovates Health Solutions. R. Kanyo was supported by a SynAD postdoctoral  
769 fellowship funded via Alzheimer Society of Alberta and Northwest Territories through their  
770 Hope for Tomorrow program and the University Hospital Foundation. We would like to also  
771 extend our thanks to members of the Allison and Ali lab. In addition, we would also like to  
772 acknowledge the Sciences Animal Support Services at the University of Alberta.

773

774 **AUTHOR'S CONTRIBUTIONS**

775 RK, MRA, WTA, DWA contributed to the experimental design. RK, MRA, LFL, DDB, AMO,  
776 performed the experiments and analyzed the data. RK, MRA and DWA interpreted the results.  
777 RK, WTA and DWA wrote the manuscript. All authors read and approved the manuscript.

778

779 **Additional Information**

780 Competing Interests: The authors declare no competing interests.

781

782 **Figure 1: High-throughput quantification of neural activity in freely-swimming zebrafish**  
783 **larvae. (a)** CaMPARI photoconverts from green to red fluorescing versions in the neuron only in  
784 the presence of both high intracellular calcium concentrations and a bright 405 nm light source.  
785 **(b)** Lateral view of green fluorescing CaMPARI merged with brightfield image shows exclusive  
786 expression in the CNS due to a pan-neural promoter (*elavl3*). **(c)** Larvae were transferred to 48  
787 wells in the centre of a 96-well plate to ensure that the 405 nm LED Flood Array covers all  
788 larvae entirely. To minimize overheating, the plate was floating in a waterbath at 10 cm distant to  
789 the LED while CaMPARI was photoconverted (PC) by the LED Flood Array. **(d)** Lateral view of  
790 zebrafish with exemplar “CaMPARI Activity” heat maps. Heat maps show ratio of red/green  
791 (R/G) fluorescent output as indicated by the calibration bar and can be interpreted as relative  
792 neural activity. CNS regions with higher levels of neural activity translate to “hotter” pixels.  
793 Images were acquired using an automated INCell 2000 high-content microscope and reveal a  
794 reduction in neural activity when the larvae were anesthetized with MS-222 or an increase with  
795 convulsants, PTZ and 4-AP. Top, Enlarged lateral view from freely swimming larvae illustrating  
796 the optic tectum and hindbrain areas (dashed line) from which the R/G ratio was obtained. **(e)**  
797 Neural activity, inferred from the mean R/G ratio in optic tectum and hindbrain. CaMPARI  
798 activity is reduced to baseline in MS222-anaesthetized fish and photoconversion is undetectable  
799 when CaMPARI photoconverting light is omitted. Dashed green line represents mean for MS-  
800 222-anesthetized samples, which show a clear reduction in signal compared to freely swimming  
801 larvae and provides a baseline “near-zero” activity level for reference in subsequent experiments.  
802 Drivers of neural activity, PTZ and 4-AP induce a significant increase in CaMPARI activity. **(f)**  
803 Locomotor activity was measured using behavioural tracking software. PC light from the day  
804 prior at 4 days post-fertilization (dpf) did not affect locomotion at 5 dpf. MS-222 treatment

805 abolished any swim bouts. Biological replicates are individual larvae = n. \*\* Significantly  
806 different from freely swimming samples,  $p < 0.01$ .

807

808 **Figure 2: Early application of CBD and THC reduce subsequent neural activity and**

809 **locomotor activity. (a)** The chemical structures of key cannabinoids used in this study: CBD

810 and THC. **(b)**, Timeline of experimental set up where zebrafish embryos were treated with drugs

811 between 0.5 and 1 hour post-fertilization (hpf) and washed out at 10 hpf towards the end of

812 gastrulation. CaMPARI imaging was obtained at 4 days post-fertilization (dpf) and locomotor

813 activity was tracked at 5 dpf. **(c)** and **(f)**, Representative CaMPARI activity maps obtained from

814 treated larvae and corresponding quantification and statistics shown in **(d)** and **(g)**, respectively.

815 **(e)** and **(h)**, Locomotor activity of the same larvae. **(c)** CBD reduces neural activity and

816 locomotor activity as shown in **(d)** and **(e)**. **(f)** THC requires a higher dose than CBD to reduce

817 neural activity and locomotor activity as shown in **(g)** and **(h)**. CaMPARI activity heat maps

818 show ratio of R/G channels as indicated by the calibration bar, with higher ratios (hotter colours)

819 representing greater neural activity. Green-dashed lines depict mean baseline (zero) value for

820 MS-222 anesthetized samples (From Fig 1). Biological replicates are n=8-19. \* is  $p < 0.05$ ; \*\*

821  $p < 0.01$  compared to the vehicle control (0.3 % MeOH in experiments with CBD and 0.6 %

822 MeOH for THC).

823

824 **Figure 3: Antagonistic effect of CBD on neural activity is enhanced when combined with**

825 **sub-effective doses of THC.** Zebrafish larvae were exposed to a series of CBD and THC

826 concentrations by themselves or in combination, which are mostly sub-effective, or in the case of

827 CBD, were minimally effective. **(a)** and **(d)**, Exemplar CaMPARI activity heat maps show an  
828 additive effect (minimizing neural activity) when exposed to 2  $\mu\text{g/ml}$  **(d)** of each CBD and THC  
829 compared to CBD or THC by themselves (as plotted in **(e)**). When 1  $\mu\text{g/ml}$  of 1:1 CBD and THC  
830 was applied, ratios show no additive effect as illustrated by quantifications and statistics in **(b)**.  
831 **(c)** and **(f)**, Locomotor activity from the same well at 5 dpf shows a clear reduction when CBD  
832 and THC is combined at 2  $\mu\text{g/ml}$  each, but reduction mediated by CBD alone is almost as low as  
833 when combined with THC suggesting that CBD is the main component affecting locomotor  
834 activity. R/G is indicated by the calibration bar. Green-dashed lines depict mean values for MS-  
835 222-anesthetized samples (from Figure 1). Biological replicates are n=15-25. \* compared to  
836 vehicle control (equal amount of MeOH in all experiments); # compared to CBD plus THC. One  
837 symbol is  $p < 0.05$ ; Two symbols is  $p < 0.01$ .

838  
839 **Figure 4: Cannabinoid receptor 1 (CB1R) and CB2R are both involved in CBD-mediated**  
840 **reduction of locomotor activity.** Zebrafish larvae were exposed to CBD (3  $\mu\text{g/ml}$ ) with CB1R-  
841 and CB2R inhibitors, AM251 and AM630, respectively. **(a)** and **(b)**, Exemplar CaMPARI heat  
842 maps showing R/G ratios obtained at 4 dpf. **(c)** and **(d)**, Corresponding quantifications showing  
843 CBD mediated-reduction of neural activity is not fully rescued when CB1R is inhibited with  
844 AM251 or CB2R with AM630 in the nanomolar (nM) range. **(e)** and **(f)**, Locomotor activity at 5  
845 dpf shows a clear rescue when inhibiting either CB1R or CB2R with 0.1 nM AM251, or 10 nM  
846 AM630, respectively. **(g)** and **(h)**, shows that applying AM251 or AM630 without CBD did not  
847 affect CaMPARI activity or locomotion. R/G is indicated by the calibration bar. All samples  
848 contained the same amount of vehicle DMSO (0.1 %) and MeOH (0.3 %) including the vehicle  
849 control (Veh.). Green-dashed lines depict mean values for MS-222 anesthetized samples.  
850 Biological replicates are n=13-30. \* is  $p < 0.05$ ; \*\*  $p < 0.01$  compared to CBD.

851

852 **Figure S1: Supplementary figure accompanying Fig.2.** Re-plotting data to illustrate that CBD  
853 shows an effect at lower concentration than THC. Quantifications of CaMPARI activity (left) or  
854 locomotor activity (right) showing a statistical difference between CBD and THC at 4 or 5 days  
855 post-fertilization when adding 3.0  $\mu\text{g/ml}$  of either cannabinoids. Green-dashed lines depict mean  
856 values for MS-222 anesthetized samples. Biological replicates are  $n=14-28$ . Statistics using  
857 unpaired t-test shows \*\*  $p<0.01$  compared to CBD.

858

859 **Figure S2: Supplementary figure accompanying Fig.2.** Re-plotting data from groups that were  
860 treated with vehicle, CBD (3  $\mu\text{g/ml}$ ) or THC (6  $\mu\text{g/ml}$ ) to assess correlation between CaMPARI  
861 activity vs. Locomotor activity within the same larvae. There is a significant positive linear  
862 correlation between neural activity and locomotor activity when corresponding vehicle controls  
863 (black circles) were plotted with either CBD (a; red circles) or THC (b; blue circles). Green-  
864 dashed lines depict mean values for MS-222 anesthetized samples.

865

866 **Figure S3: Supplementary figure accompanying Fig.3.** Additive effects in reducing neural  
867 activity are also obtained at lower CBD concentrations while THC concentration is kept constant  
868 at 2  $\mu\text{g/ml}$ . (a) Exemplar CaMPARI activity heat maps obtained at 4 days post-fertilization show  
869 an effect at 0.5 and 1.5  $\mu\text{g/ml}$  of CBD when combined with 2  $\mu\text{g/ml}$  THC (blue) compared to  
870 CBD alone (red), as illustrated by quantifications in (b). (c) Locomotor activity from the same  
871 well at 5 dpf. R/G as indicated by the calibration bar. Green-dashed lines depict mean values for



872 MS-222 anesthetized samples. Biological replicates are n=14-28. \* is compared to CBD; # is  
873 compared to Vehicle. One symbol is p<0.05; two symbols are p<0.01.

874

875 **Figure S4: Supplementary figure accompanying Fig.3.** RMO44 staining of reticulospinal  
876 neurons in the hindbrain shows a decrease in fluorescence intensities when combining CBD and  
877 THC at 2 µg/ml at 5 dpf compared to when CBD or THC was added alone. Images show  
878 biological replicates (n=3), left to right, from corresponding treatment group, top to bottom.

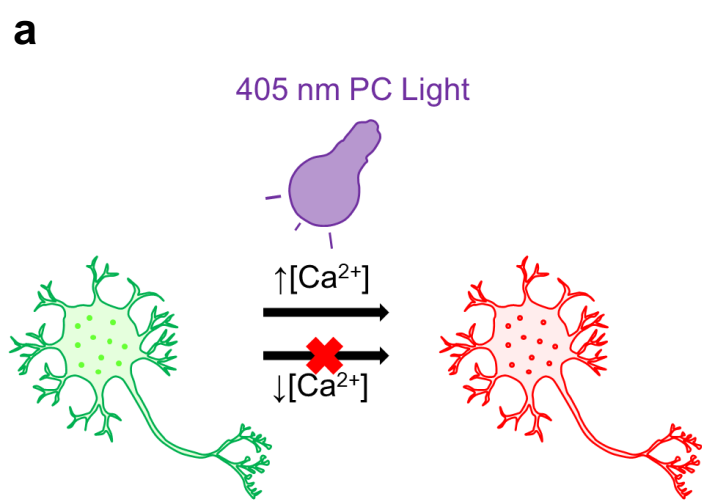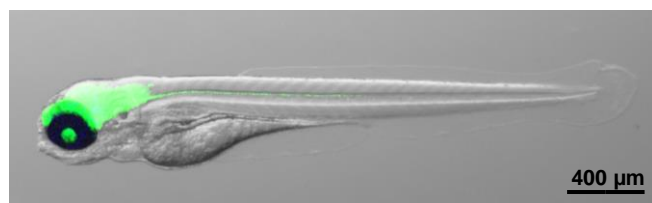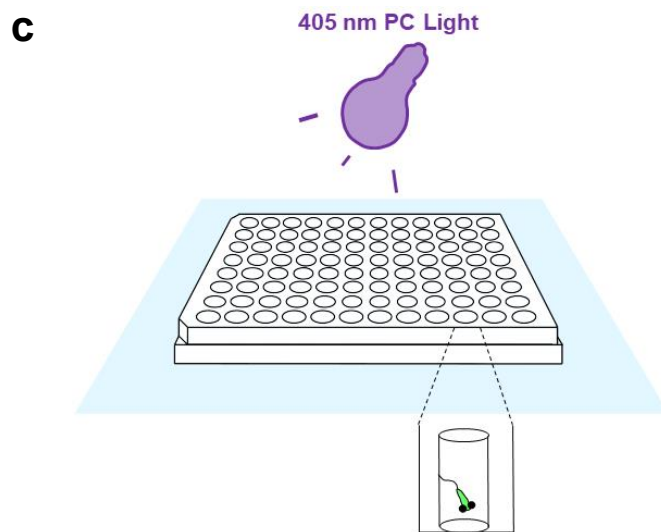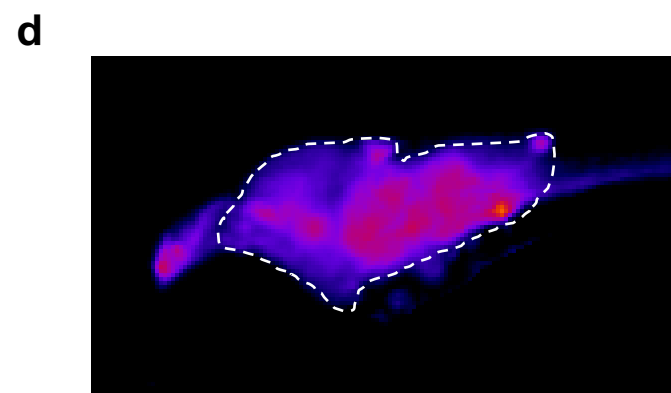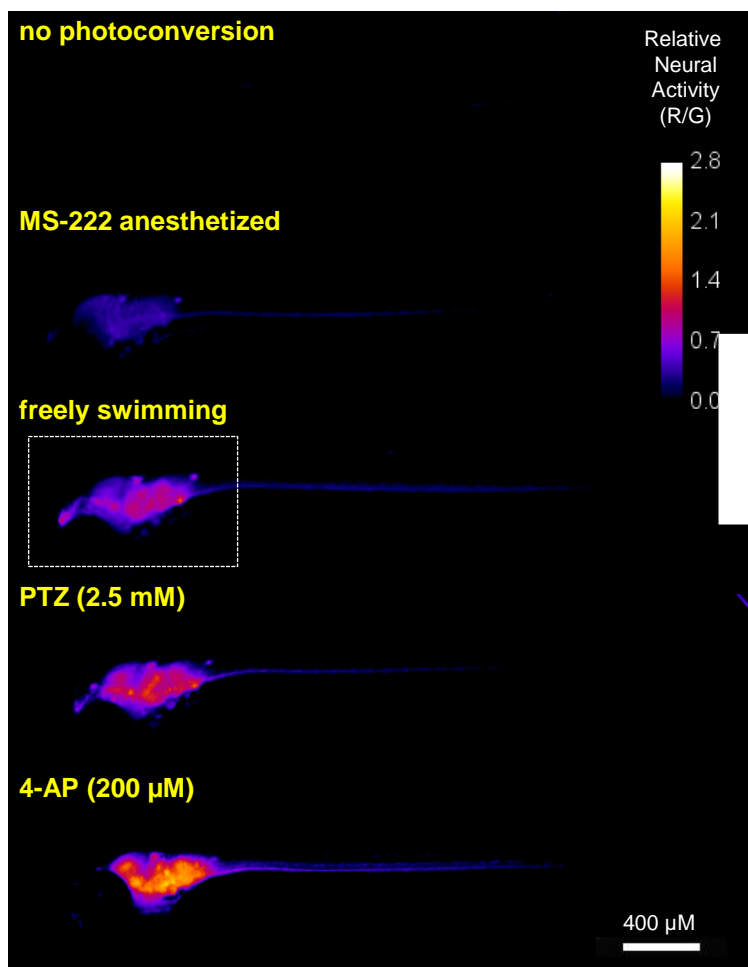

**e** CaMPARI Activity

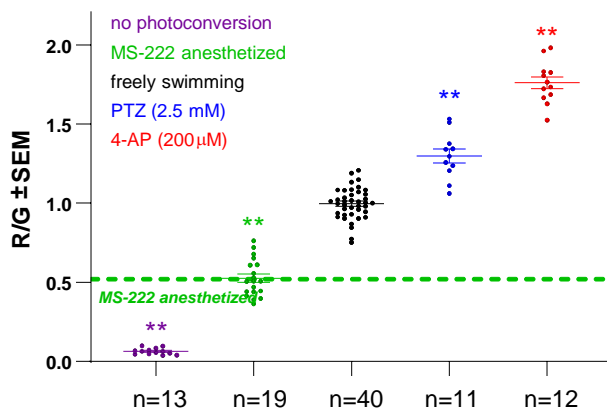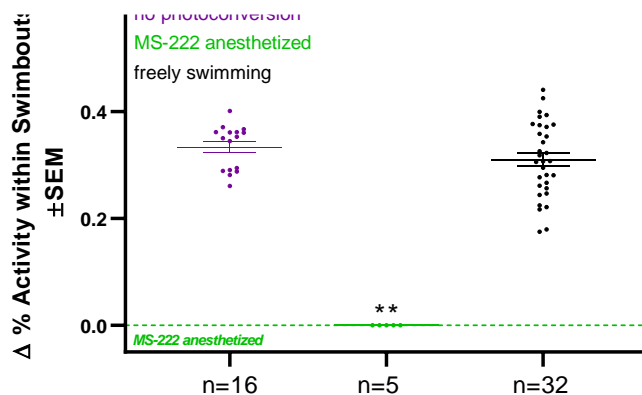

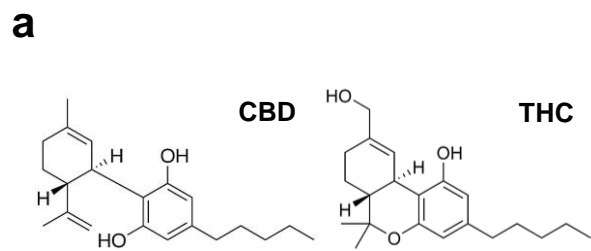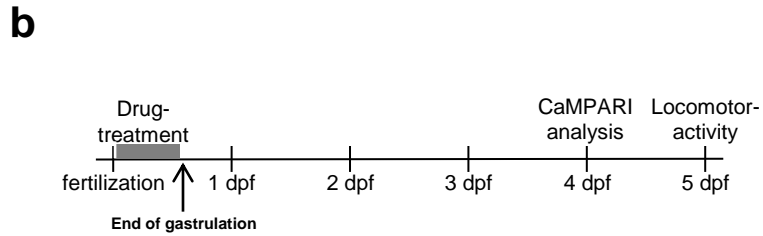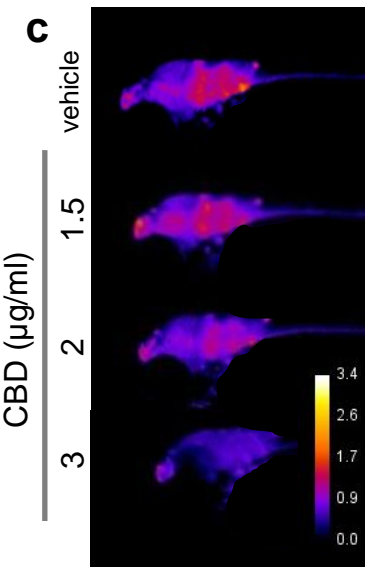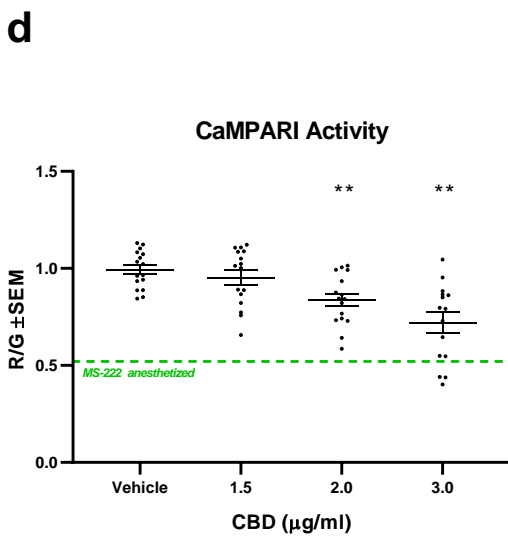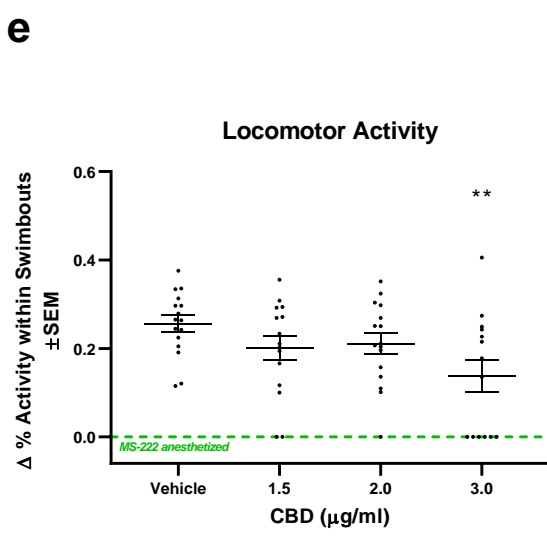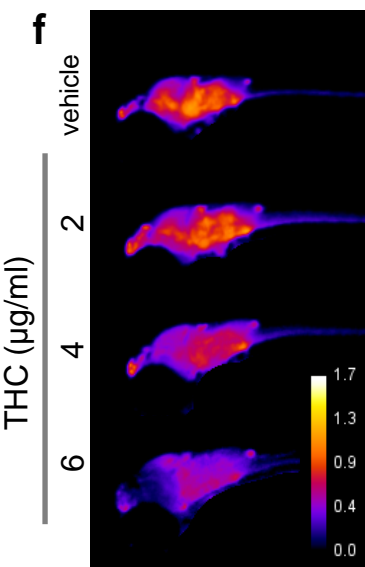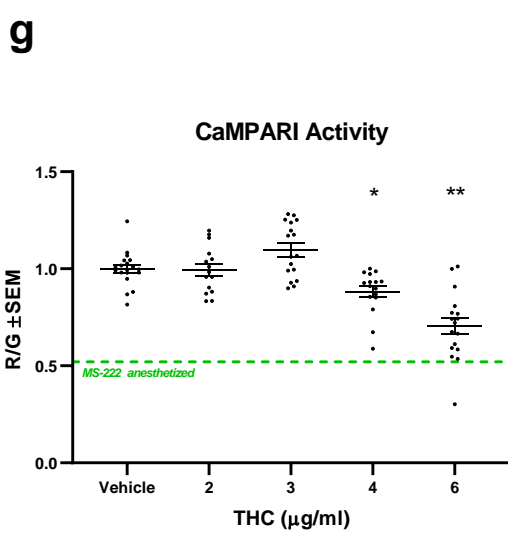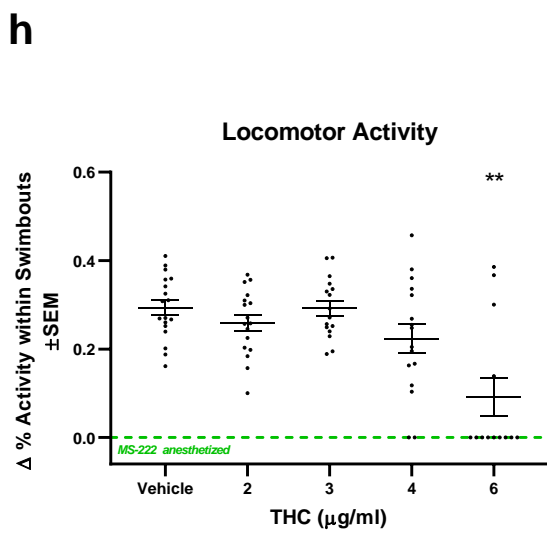

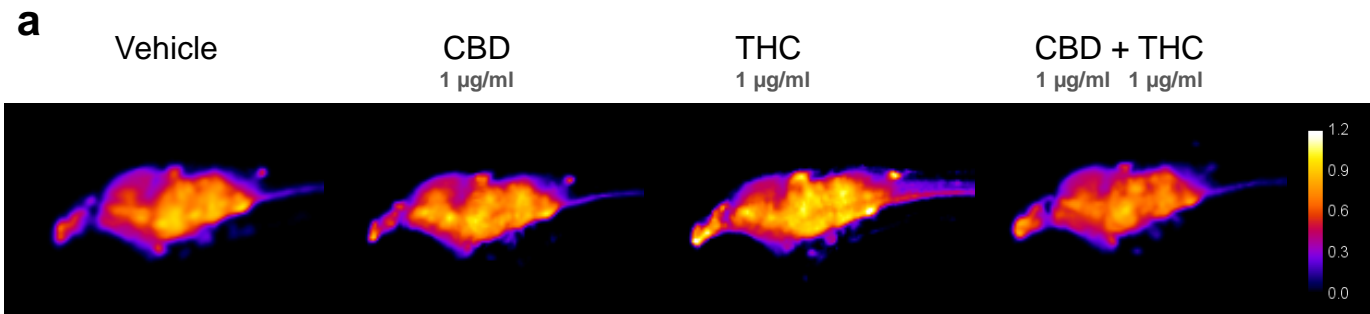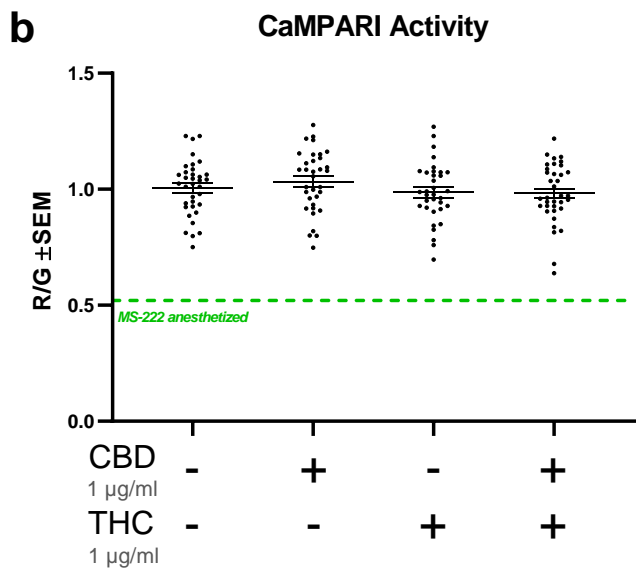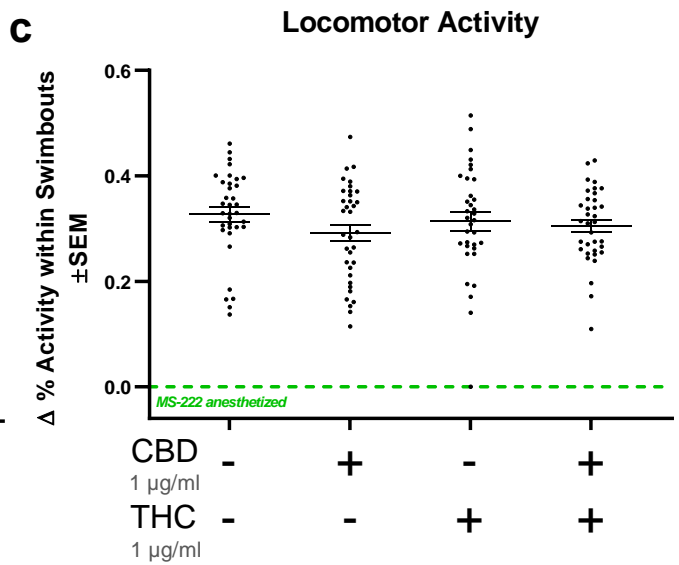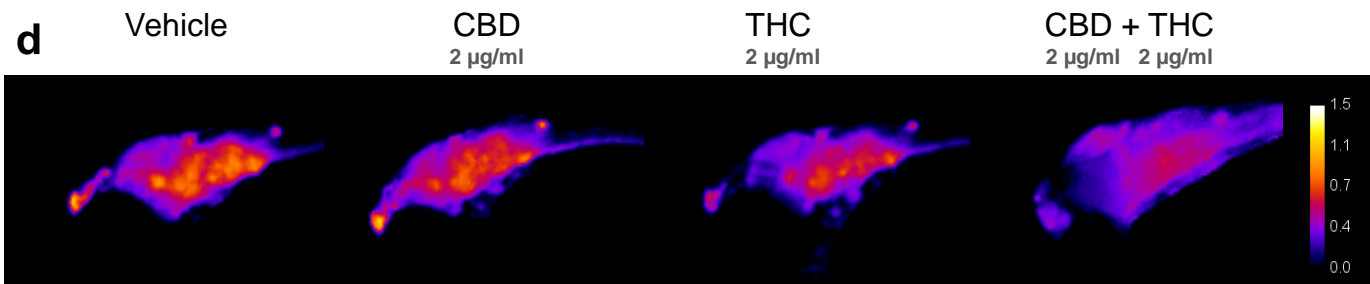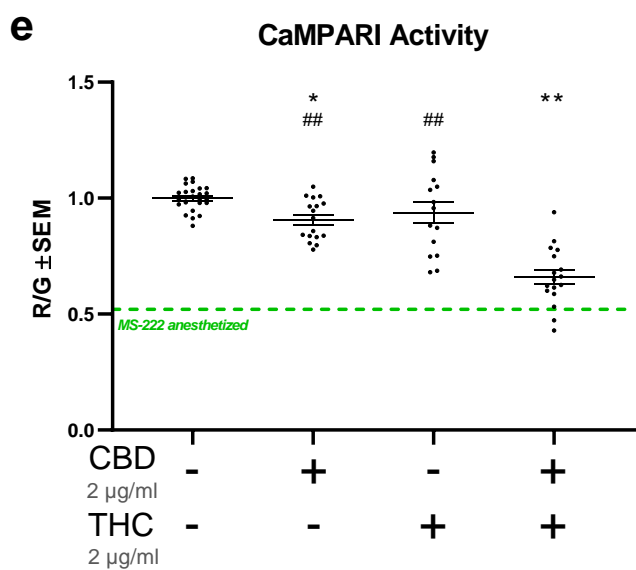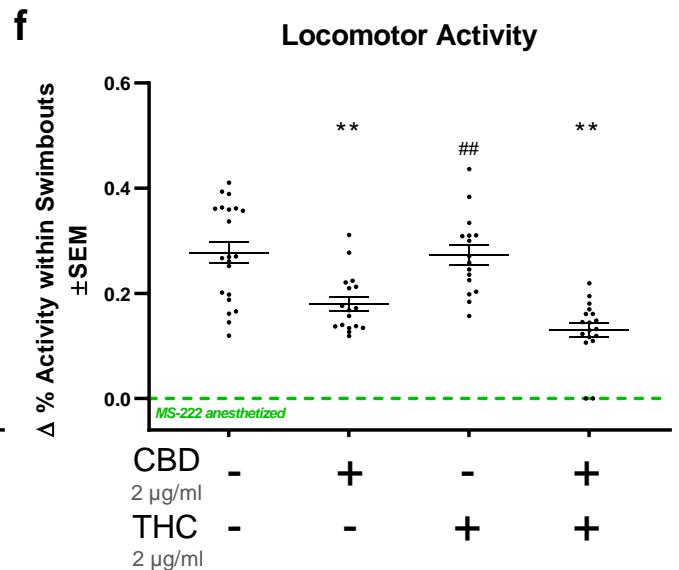

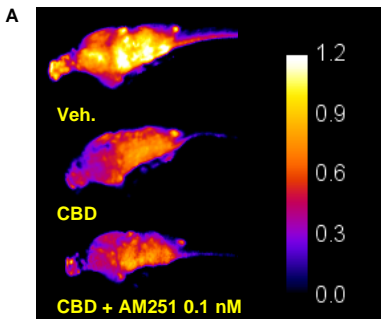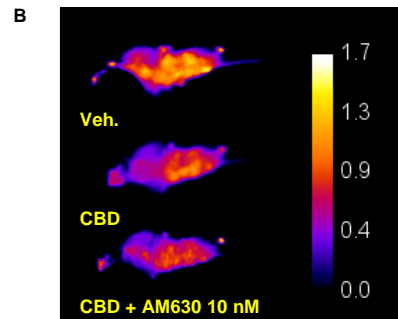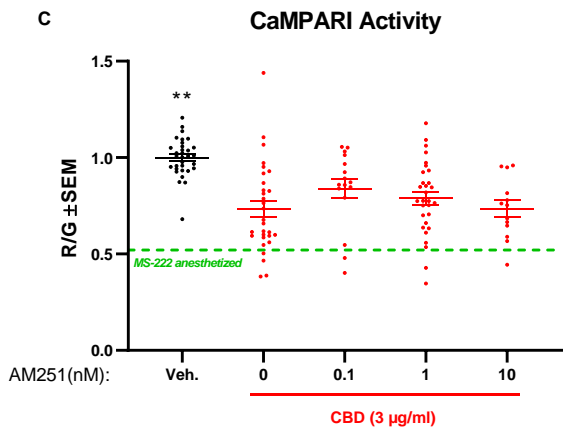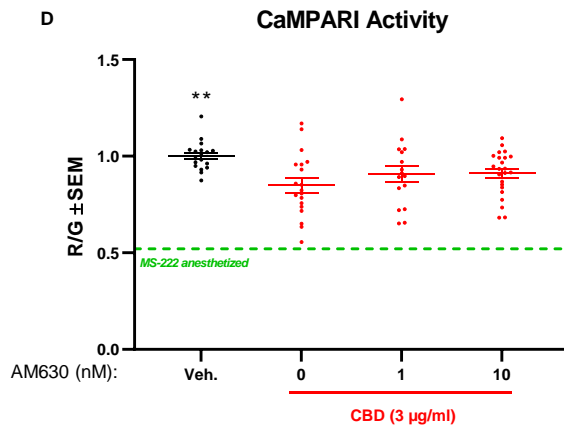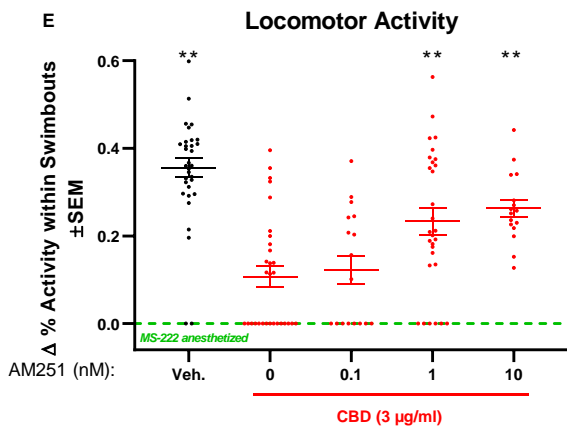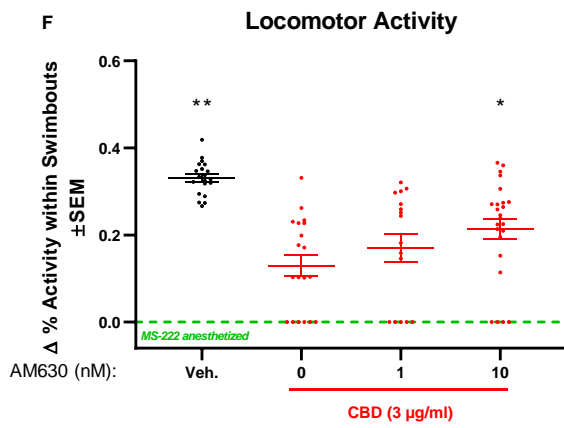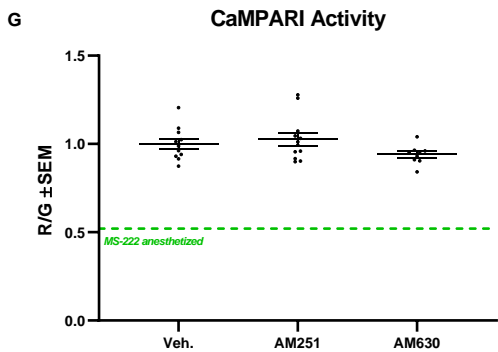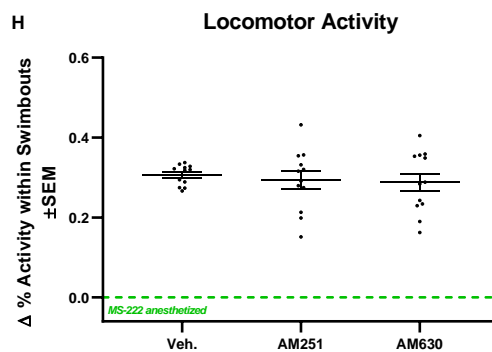

Source: https://www.biorxiv.org/content/biorxiv/early/2021/03/02/2021.01.04.425279.full.pdf
